# Supplementary material
Source: PubMed Central journal article supplement (PMC5978725)
Supplement: NIHMS936126-supplement-supplement_1.pdf [file NIHMS936126-supplement-supplement_1.pdf]

**Supplemental Table 1**  
**Baseline Characteristics of Adult Combustible Tobacco Users in Ohio, Stratified on Tobacco Product (N = 724)**

|                               | Tobacco Product, N (%) |                            |                   |                      |                 |                                            |
|-------------------------------|------------------------|----------------------------|-------------------|----------------------|-----------------|--------------------------------------------|
|                               | Cigarette<br>(N = 651) | Filtered Cigar<br>(N = 25) | Cigar<br>(N = 10) | Cigarillo<br>(N = 8) | Pipe<br>(N = 5) | Multiple Products <sup>a</sup><br>(N = 25) |
| <b>Age, years [mean (SD)]</b> | 50.1 (14.3)            | 55.7 (16.2)                | 59.1 (18.1)       | 42.7 (13.5)          | 64.3 (7.8)      | 48.6 (14.9)                                |
| <b>Region</b>                 |                        |                            |                   |                      |                 |                                            |
| <b>Urban</b>                  | 327 (50.2)             | 16 (64.0)                  | 9 (90.0)          | 8 (100.0)            | 3 (60.0)        | 13 (52.0)                                  |
| <b>Rural</b>                  | 324 (49.8)             | 9 (36.0)                   | 1 (10.0)          | 0 (0.0)              | 2 (40.0)        | 12 (48.0)                                  |
| <b>Sex</b>                    |                        |                            |                   |                      |                 |                                            |
| Male                          | 277 (42.6)             | 13 (52.0)                  | 8 (88.9)          | 7 (87.5)             | 5 (100.0)       | 11 (44.0)                                  |
| Female                        | 374 (57.5)             | 12 (48.0)                  | 1 (11.1)          | 1 (12.5)             | 0 (0.0)         | 14 (56.0)                                  |
| <b>Sexual Orientation</b>     |                        |                            |                   |                      |                 |                                            |
| Straight                      | 591 (93.1)             | 24 (96.0)                  | 10 (100.0)        | 7 (87.5)             | 5 (100.0)       | 23 (92.0)                                  |
| Gay, Bisexual, or Other       | 44 (6.9)               | 1 (4.0)                    | 0 (0.0)           | 1 (12.5)             | 0 (0.0)         | 2 (8.0)                                    |
| <b>Race</b>                   |                        |                            |                   |                      |                 |                                            |
| White                         | 526 (80.9)             | 16 (64.0)                  | 8 (80.0)          | 2 (25.0)             | 5 (100.0)       | 18 (75.0)                                  |
| Non-white                     | 124 (19.1)             | 9 (36.0)                   | 2 (20.0)          | 6 (75.0)             | 0 (0.0)         | 6 (25.0)                                   |
| <b>Education</b>              |                        |                            |                   |                      |                 |                                            |
| <High School                  | 95 (14.6)              | 4 (16.0)                   | 0 (0.0)           | 1 (12.5)             | 0 (0.0)         | 5 (20.0)                                   |
| GED/High School               | 211 (32.4)             | 9 (36.0)                   | 1 (10.0)          | 1 (12.5)             | 1 (20.0)        | 7 (28.0)                                   |
| ≥Some College                 | 345 (53.0)             | 12 (48.0)                  | 9 (90.0)          | 6 (75.0)             | 4 (80.0)        | 13 (52.0)                                  |
| <b>Household Income</b>       |                        |                            |                   |                      |                 |                                            |
| <\$25,000                     | 263 (42.8)             | 15 (62.5)                  | 1 (10.0)          | 3 (37.5)             | 2 (40.0)        | 17 (70.8)                                  |
| \$25,001-\$50,000             | 206 (33.5)             | 5 (20.8)                   | 3 (30.0)          | 2 (25.0)             | 1 (20.0)        | 4 (16.7)                                   |
| >\$50,000                     | 146 (23.7)             | 4 (16.6)                   | 6 (60.0)          | 3 (37.5)             | 2 (40.0)        | 3 (12.5)                                   |
| <b>Marital Status</b>         |                        |                            |                   |                      |                 |                                            |
| Single/Never married          | 210 (32.3)             | 8 (32.0)                   | 3 (30.0)          | 3 (37.5)             | 1 (20.0)        | 6 (24.0)                                   |
| Married/Living with partner   | 237 (36.4)             | 5 (20.0)                   | 4 (40.0)          | 4 (50.0)             | 3 (60.0)        | 9 (36.0)                                   |
| Divorced/Separated            | 156 (24.0)             | 8 (32.0)                   | 3 (30.0)          | 1 (12.5)             | 1 (20.0)        | 10 (40.0)                                  |
| Widowed                       | 48 (7.4)               | 4 (16.0)                   | 0 (0.0)           | 0 (0.0)              | 0 (0.0)         | 0 (0.0)                                    |
| <b>Employment Status</b>      |                        |                            |                   |                      |                 |                                            |
| Full-time                     | 260 (40.1)             | 3 (12.0)                   | 6 (60.0)          | 4 (50.0)             | 1 (20.0)        | 5 (20.0)                                   |
| Part-time                     | 86 (13.3)              | 3 (12.0)                   | 1 (10.0)          | 1 (12.5)             | 0 (0.0)         | 6 (24.0)                                   |
| Unemployed                    | 303 (46.7)             | 19 (76.0)                  | 3 (30.0)          | 3 (37.5)             | 4 (80.0)        | 14 (56.0)                                  |

**Note.**

**a: Multiple products include combinations of cigarettes with filtered cigars (N = 10), cigarillos (N = 4), pipes (N = 2), or cigars (N = 1), and combinations of pipes with cigars (N = 1) or filtered cigars (N = 1). The remaining participants used ≥3 combustible products (N = 6).**

**Supplemental Table 2**  
**Most Commonly Reported Brand and Purchase Location of Tobacco Products among**  
**Adult Tobacco Users in Ohio (N = 1210)**

| Product                 | Most Reported Brand(s)                 | Most Reported Purchase Location <sup>a</sup> |
|-------------------------|----------------------------------------|----------------------------------------------|
| <b>Combustible</b>      |                                        |                                              |
| Cigarettes              | Marlboro (manufactured); Bacco (loose) | Convenience store                            |
| Pipe Tobacco            | Captain Black / Gambler <sup>b</sup>   | Tobacco specialty store                      |
| Cigar                   | Swisher Sweets                         | Tobacco specialty store                      |
| Small Cigar             | Black and Mild                         | Convenience store                            |
| Little Filtered Cigar   | Supreme Blend                          | Convenience store                            |
| Shisha Tobacco          | Starbuzz                               | Tobacco specialty store                      |
| <b>SLT</b>              |                                        |                                              |
| Chewing or Spit Tobacco | Starr / Red Man <sup>b</sup>           | Tobacco specialty store                      |
| Snuff or Dip            | Grizzly                                | Convenience store                            |
| Snus                    | Camel Snus                             | Convenience store                            |
| <b>ENDS</b>             | Vuse                                   | Tobacco specialty store                      |

**Note.**

**a: Convenience stores include gas stations; tobacco specialty stores include outlets**

**b: Tie between 2 products**

**Supplemental Table 3**  
**Baseline Tobacco-related Behaviors among Adult Combustible Tobacco Users in Ohio,**  
**Stratified on Tobacco Product (N = 724)**

|                                            | Tobacco Product, N (%) |                               |                   |                      |                 |                                               |
|--------------------------------------------|------------------------|-------------------------------|-------------------|----------------------|-----------------|-----------------------------------------------|
|                                            | Cigarette<br>(N = 651) | Filtered<br>Cigar<br>(N = 25) | Cigar<br>(N = 10) | Cigarillo<br>(N = 8) | Pipe<br>(N = 5) | Multiple<br>Products <sup>a</sup><br>(N = 25) |
| <b>Daily User</b>                          |                        |                               |                   |                      |                 |                                               |
| No                                         | 33 (5.1)               | 1 (4.0)                       | 6 (60.0)          | 0 (0.0)              | 0 (0.0)         | 0 (0.0)                                       |
| Yes                                        | 617 (94.9)             | 24 (96.0)                     | 4 (40.0)          | 8 (100.0)            | 5 (100.0)       | 25 (100.0)                                    |
| <b>Age Began Regular Use [mean (SD)]</b>   | 17.7 (5.2)             | 20.1 (10.8)                   | 24.2 (8.9)        | 22.3 (9.6)           | 18.8 (3.0)      | 17.1 (4.4)                                    |
| <b>Years Consumed Tobacco [mean (SD)]</b>  | 32.4 (14.2)            | 35.6 (16.4)                   | 34.9 (22.1)       | 20.5 (12.3)          | 45.5 (6.7)      | 31.5 (15.8)                                   |
| <b>Years Consumed Product [mean (SD)]</b>  | 32.3 (14.2)            | 35.6 (16.4)                   | 34.9 (22.1)       | 20.5 (12.3)          | 45.5 (6.7)      | 31.4 (15.8)                                   |
| <b>Time to First Use, minutes</b>          |                        |                               |                   |                      |                 |                                               |
| >30                                        | 216 (33.3)             | 9 (36.0)                      | 8 (88.9)          | 6 (75.0)             | 5 (100.0)       | 10 (40.0)                                     |
| ≤30                                        | 432 (66.7)             | 16 (64.0)                     | 1 (11.1)          | 2 (25.0)             | 0 (0.0)         | 15 (60.0)                                     |
| <b>Cessation Interest [mean (SD)]</b>      | 6.3 (3.0)              | 6.0 (4.0)                     | 4.1 (3.2)         | 7.4 (3.0)            | 3.0 (2.0)       | 5.0 (3.5)                                     |
| <b>Stage of Change</b>                     |                        |                               |                   |                      |                 |                                               |
| Pre-Contemplation                          | 324 (57.8)             | 15 (62.5)                     | 8 (80.0)          | 5 (71.4)             | 4 (100.0)       | 15 (65.2)                                     |
| Contemplation                              | 202 (36.0)             | 8 (33.3)                      | 2 (20.0)          | 2 (28.6)             | 0 (0.0)         | 8 (34.8)                                      |
| Preparation                                | 35 (6.2)               | 1 (4.2)                       | 0 (0.0)           | 0 (0.0)              | 0 (0.0)         | 0 (0.0)                                       |
| <b>Previous Quit Attempts in Past Year</b> |                        |                               |                   |                      |                 |                                               |
| None                                       | 442 (67.9)             | 17 (68.0)                     | 9 (90.0)          | 5 (62.5)             | 4 (80.0)        | 19 (76.0)                                     |
| 1-4                                        | 165 (25.4)             | 6 (24.0)                      | 1 (10.0)          | 3 (37.5)             | 0 (0.0)         | 5 (20.0)                                      |
| ≥5                                         | 44 (6.8)               | 2 (8.0)                       | 0 (0.0)           | 0 (0.0)              | 1 (20.0)        | 1 (4.0)                                       |
| <b>Other Household Tobacco Users</b>       |                        |                               |                   |                      |                 |                                               |
| No                                         | 262 (40.3)             | 10 (40.0)                     | 2 (20.0)          | 1 (12.5)             | 1 (20.0)        | 14 (56.0)                                     |
| Yes                                        | 389 (59.8)             | 15 (60.0)                     | 8 (80.0)          | 7 (87.5)             | 4 (80.0)        | 11 (44.0)                                     |
| <b>Binge Drinking</b>                      |                        |                               |                   |                      |                 |                                               |
| No                                         | 465 (74.0)             | 23 (95.8)                     | 7 (70.0)          | 6 (75.0)             | 5 (100.0)       | 19 (76.0)                                     |
| Yes                                        | 163 (26.0)             | 1 (4.2)                       | 3 (30.0)          | 2 (25.0)             | 0 (0.0)         | 6 (24.0)                                      |
| <b>Work Indoor Air Restrictions</b>        |                        |                               |                   |                      |                 |                                               |
| Never Allowed                              | 287 (89.4)             | 4 (66.7)                      | 6 (85.7)          | 4 (80.0)             | 1 (100.0)       | 10 (90.9)                                     |
| Sometimes Allowed                          | 24 (7.5)               | 1 (16.7)                      | 0 (0.0)           | 1 (20.0)             | 0 (0.0)         | 1 (9.1)                                       |
| Always Allowed                             | 10 (3.1)               | 1 (16.7)                      | 1 (14.3)          | 0 (0.0)              | 0 (0.0)         | 0 (0.0)                                       |

**Note.**

**a: Multiple products include combinations of cigarettes with filtered cigars (N = 10), cigarillos (N = 4), pipes (N = 2), or cigars (N = 1), and combinations of pipes with cigars (N = 1) or filtered cigars (N = 1). The remaining participants used ≥3 combustible products (N = 6).**
